# Supplementary material for: Silver nanoparticles as highly efficient and selective optical probe for sulphide via dendrimer formation in aqueous medium
Source: Royal Society of Chemistry journal article supplement (doi:10.1039/c5ra25625a), 2016-01-01

## *Electronic Supporting Information*

### **Silver nanoparticles as highly efficient and selective optical probe for Sulphide via dendrimer formation in aqueous medium†**

**Isha Sanskriti and K. K. Upadhyay\***

*Department of Chemistry (Centre of Advanced Study), Faculty of Science, Banaras Hindu*

*University, Varanasi, Uttar Pradesh-221005, India.*

*E-mail: drkaushalbhu@yahoo.co.in; kku@bhu.ac.in, Tel: +91-542-6702488*

---

#### **Table of contents**

| <b>S. No.</b> | <b>Figures</b>   | <b>Captions</b>                                                                                                                                                                                                         | <b>Page No.</b> |
|---------------|------------------|-------------------------------------------------------------------------------------------------------------------------------------------------------------------------------------------------------------------------|-----------------|
| <b>1.</b>     | <b>Scheme 1</b>  | Synthesis of the Capping Agent (CA)                                                                                                                                                                                     | <b>3</b>        |
| <b>2.</b>     | <b>Figure S1</b> | $^1\text{H}$ NMR spectrum of CA in $\text{CDCl}_3$                                                                                                                                                                      | <b>4</b>        |
| <b>3.</b>     | <b>Figure S2</b> | $^{13}\text{C}$ NMR spectrum of CA in $\text{CDCl}_3$                                                                                                                                                                   | <b>5</b>        |
| <b>4.</b>     | <b>Figure S3</b> | IR spectrum of CA                                                                                                                                                                                                       | <b>6</b>        |
| <b>5.</b>     | <b>Figure S4</b> | HRMS of CA                                                                                                                                                                                                              | <b>7</b>        |
| <b>6.</b>     | <b>Figure S5</b> | CA capped AgNPs                                                                                                                                                                                                         | <b>8</b>        |
| <b>7.</b>     | <b>Figure S6</b> | UV-visible spectrum of synthesized AgNPs at different pH (6, 8, 10 and 14).                                                                                                                                             | <b>9</b>        |
| <b>8.</b>     | <b>Figure S7</b> | Naked eye response and the corresponding UV-visible spectrum of AgNPs with metals (10 $\mu\text{l}$ of $1.0 \times 10^{-1}$ M).                                                                                         | <b>10</b>       |
| <b>9.</b>     | <b>Figure S8</b> | Naked eye response and the corresponding UV-visible spectrum of AgNPs showing interference study in the individual mixture of $\text{S}^{2-}$ with other anions.                                                        | <b>11</b>       |
| <b>10.</b>    | <b>Figure S9</b> | Naked eye response and UV-visible spectrum of AgNPs in the mixture of all anions (10 $\mu\text{l}$ of $1.0 \times 10^{-1}$ M) and addition of $\text{S}^{2-}$ (10 $\mu\text{l}$ of $1.0 \times 10^{-1}$ M) to the same. | <b>12</b>       |

## *Electronic Supporting Information*

|            |                    |                                                                                                                                                                                                       |           |
|------------|--------------------|-------------------------------------------------------------------------------------------------------------------------------------------------------------------------------------------------------|-----------|
| <b>11.</b> | <b>Figure S10</b>  | Naked eye response and UV-visible spectrum of AgNPs in the mixture of all cations (10 $\mu$ l of $1.0 \times 10^{-1}$ M) and addition of $S^{2-}$ (10 $\mu$ l of $1.0 \times 10^{-1}$ M) to the same. | <b>13</b> |
| <b>12.</b> | <b>Figure S11a</b> | Stability of AgNPs at different pH (1 to 13).                                                                                                                                                         | <b>14</b> |
| <b>13.</b> | <b>Figure S11b</b> | Colorimetric sensing of $S^{2-}$ through AgNPs at different pH (1 to 13).                                                                                                                             | <b>14</b> |
| <b>14.</b> | <b>Figure S12</b>  | UV-visible spectrum of $5 \times 10^{-5}$ M CA and on the addition of 10 $\mu$ l of $1.0 \times 10^{-1}$ M $S^{2-}$ to it.                                                                            | <b>15</b> |
| <b>15.</b> | <b>Figure S13a</b> | EDX of spherical shaped CA capped AgNPs.                                                                                                                                                              | <b>16</b> |
| <b>16.</b> | <b>Figure S13b</b> | EDX of $S^{2-}$ induced dendritic architecture of AgNPs.                                                                                                                                              | <b>16</b> |

## Electronic Supporting Information

**Scheme 1:** Synthesis of the Capping Agent (CA):

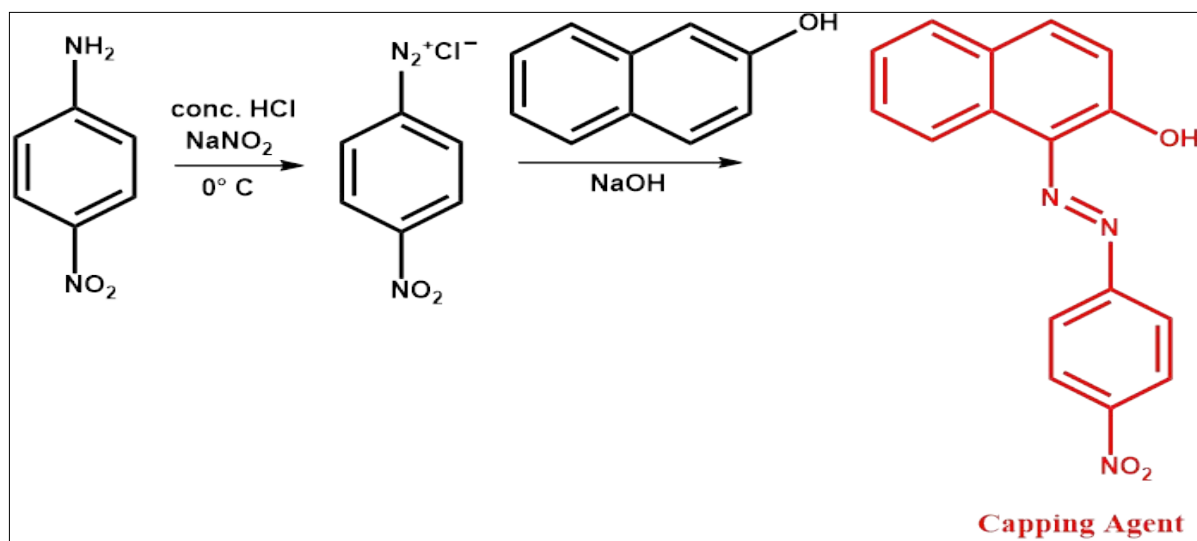

## Electronic Supporting Information

**Figure S1:**  $^1\text{H}$  NMR spectrum of CA in  $\text{CDCl}_3$ :

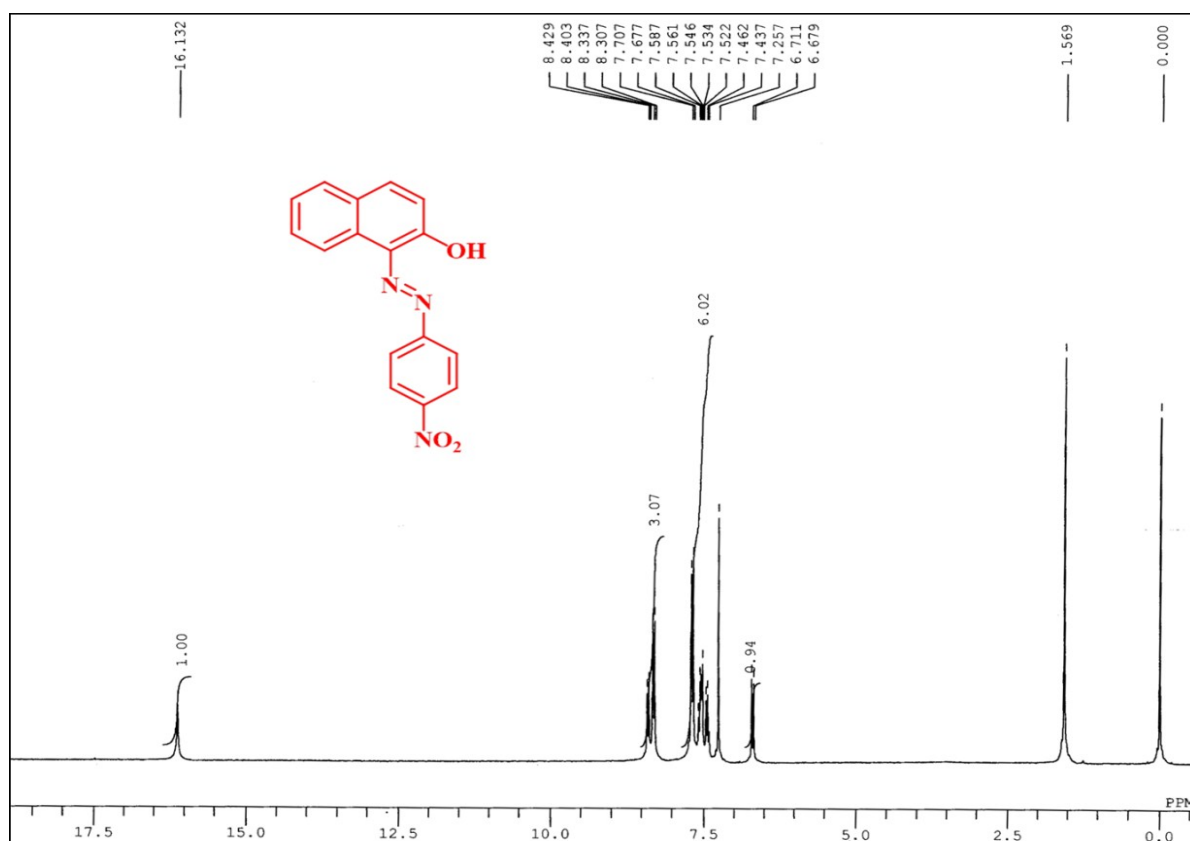

## Electronic Supporting Information

**Figure S2:**  $^{13}\text{C}$  NMR spectrum of CA in  $\text{CDCl}_3$ :

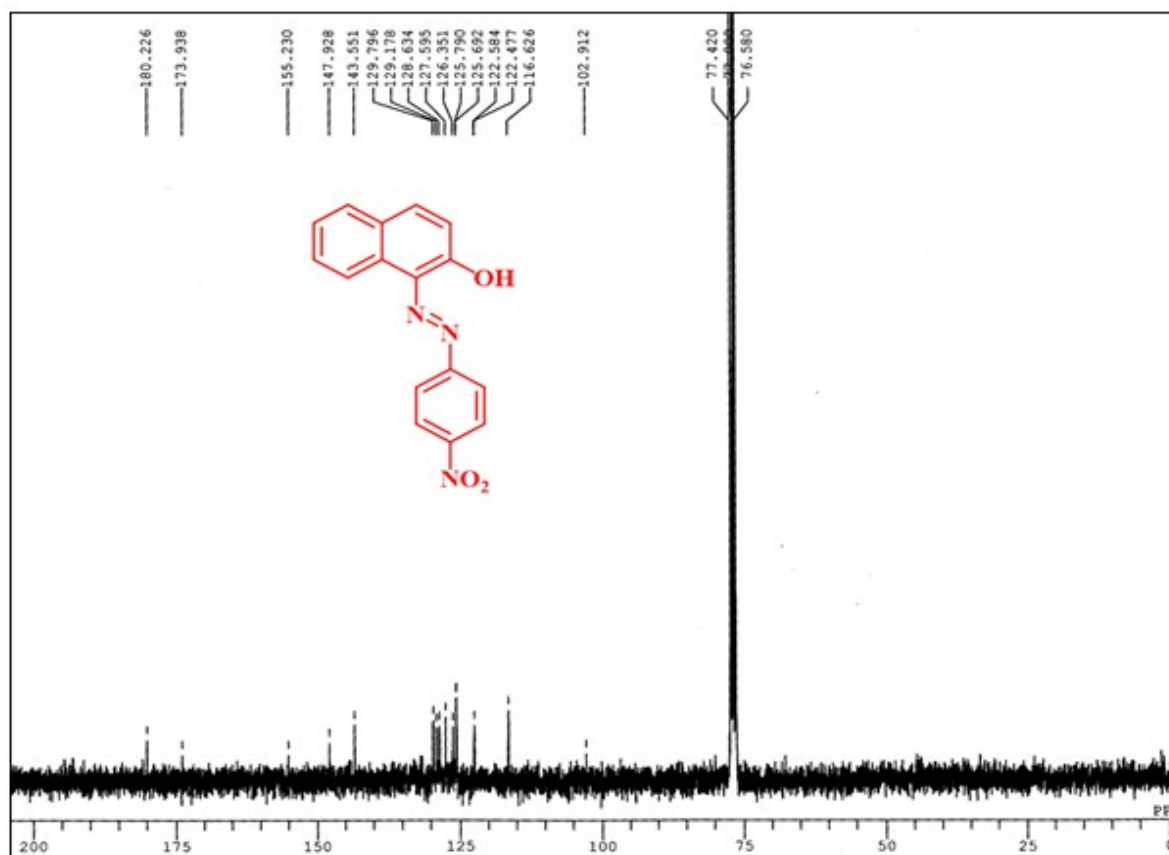

## Electronic Supporting Information

Figure S3: IR spectrum of CA:

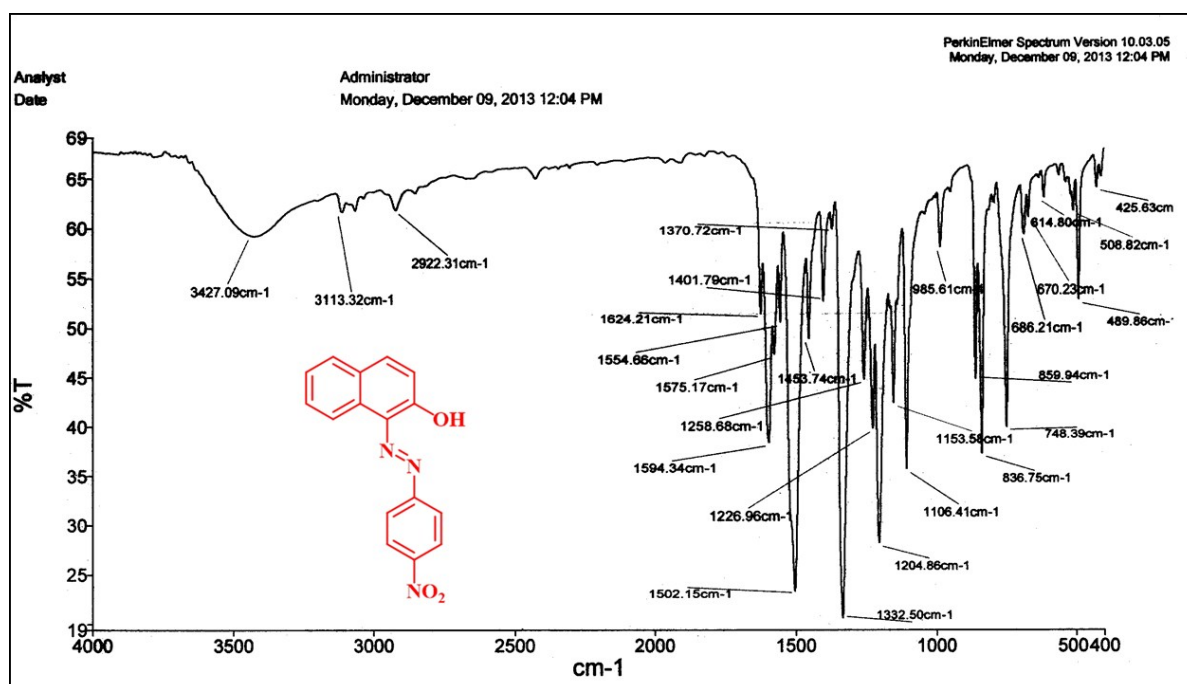

## Electronic Supporting Information

**Figure S4:** HRMS of CA:

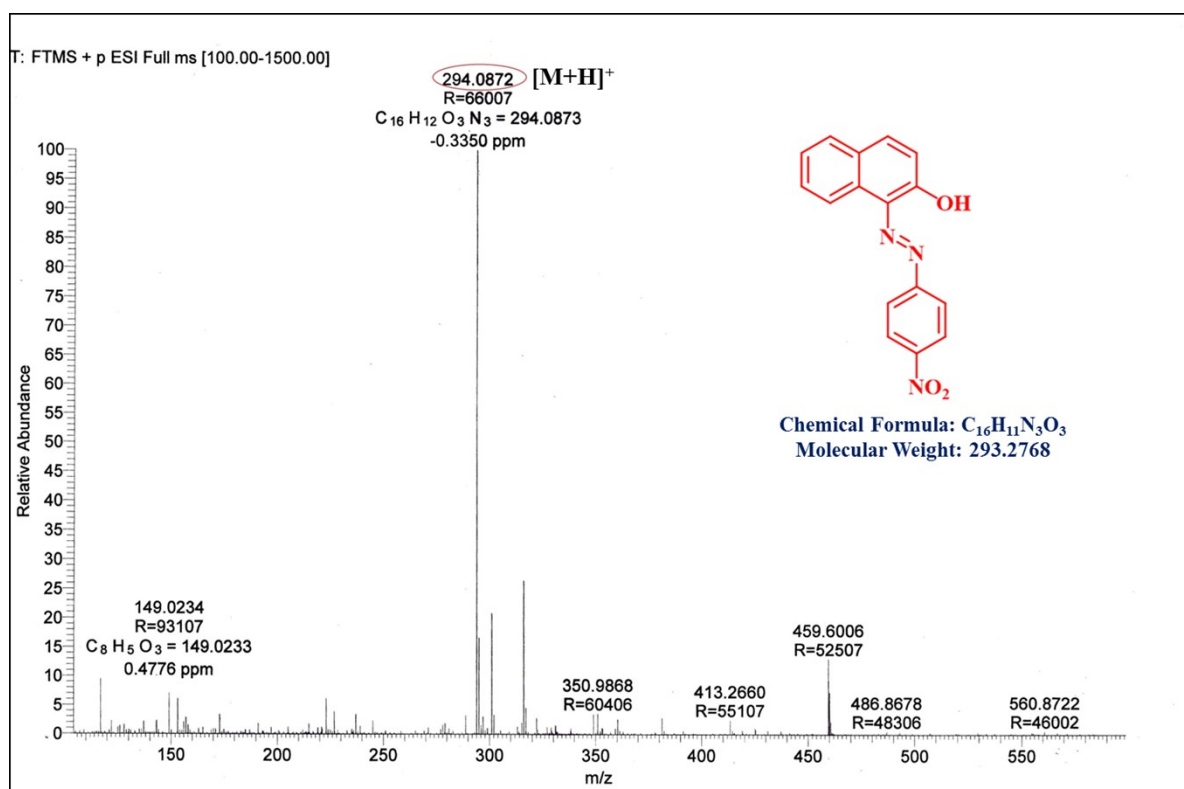

## *Electronic Supporting Information*

**Figure S5:** CA Capped AgNPs:

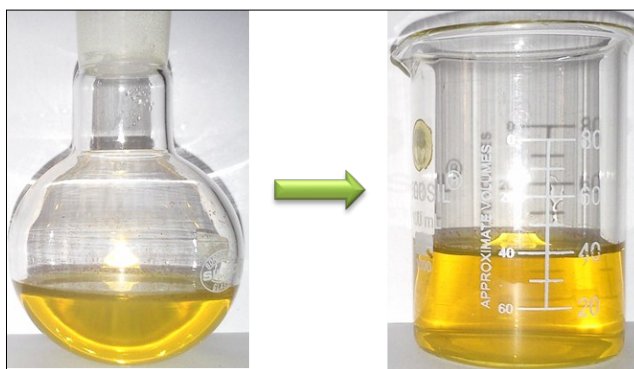



## *Electronic Supporting Information*

**Figure S6:** UV-visible spectrum of synthesized AgNPs at different pH (6, 8, 10 and 14):

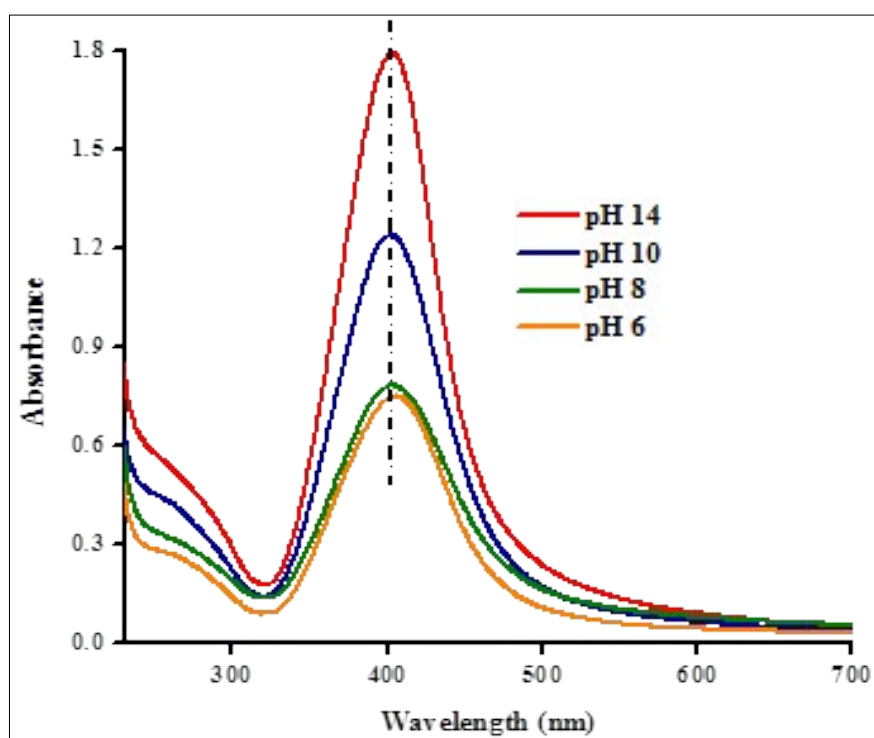

## Electronic Supporting Information

**Figure S7:** Naked eye response and the corresponding UV-visible spectrum of AgNPs with metals ( $10\ \mu\text{l}$  of  $1.0 \times 10^{-1}\ \text{M}$ ):

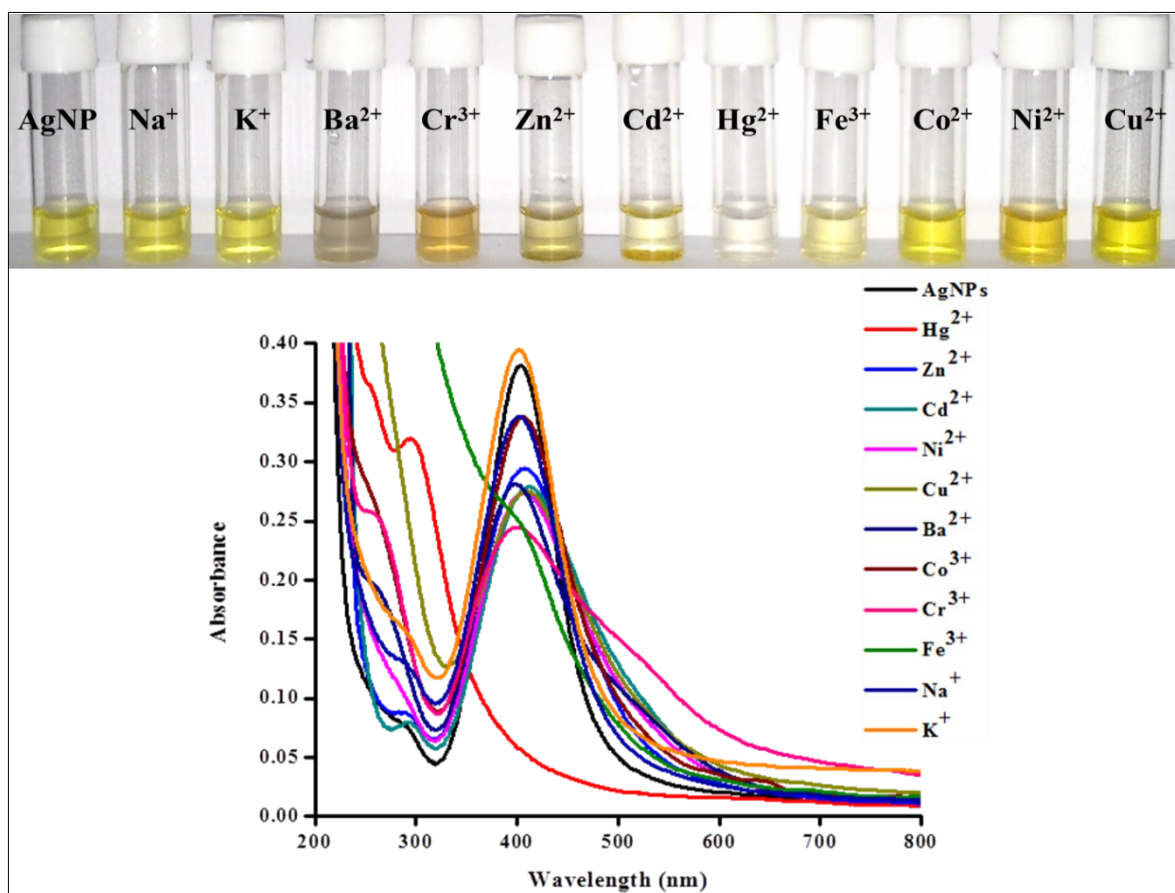

## Electronic Supporting Information

**Figure S8:** Naked eye response and the corresponding UV-visible spectrum of AgNPs showing interference study in the individual mixture of  $S^{2-}$  with other anions:

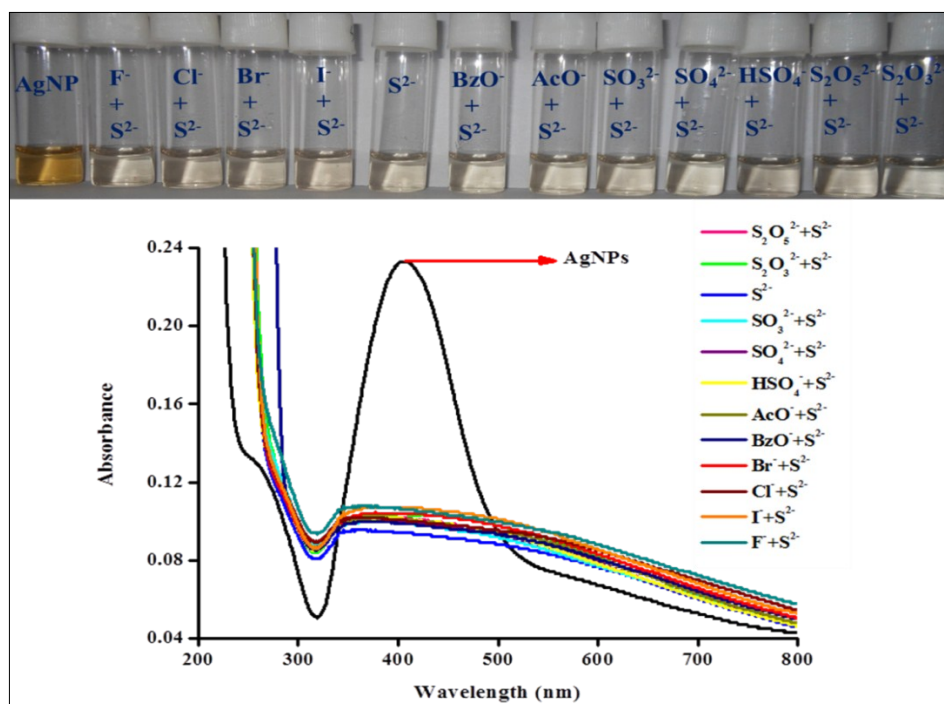

## Electronic Supporting Information

**Figure S9:** Naked eye response and UV-visible spectrum of AgNPs in the mixture of all anions ( $10\ \mu\text{l}$  of  $1.0\times 10^{-1}\ \text{M}$ ) and addition of  $\text{S}^{2-}$  ( $10\ \mu\text{l}$  of  $1.0\times 10^{-1}\ \text{M}$ ) to the same:

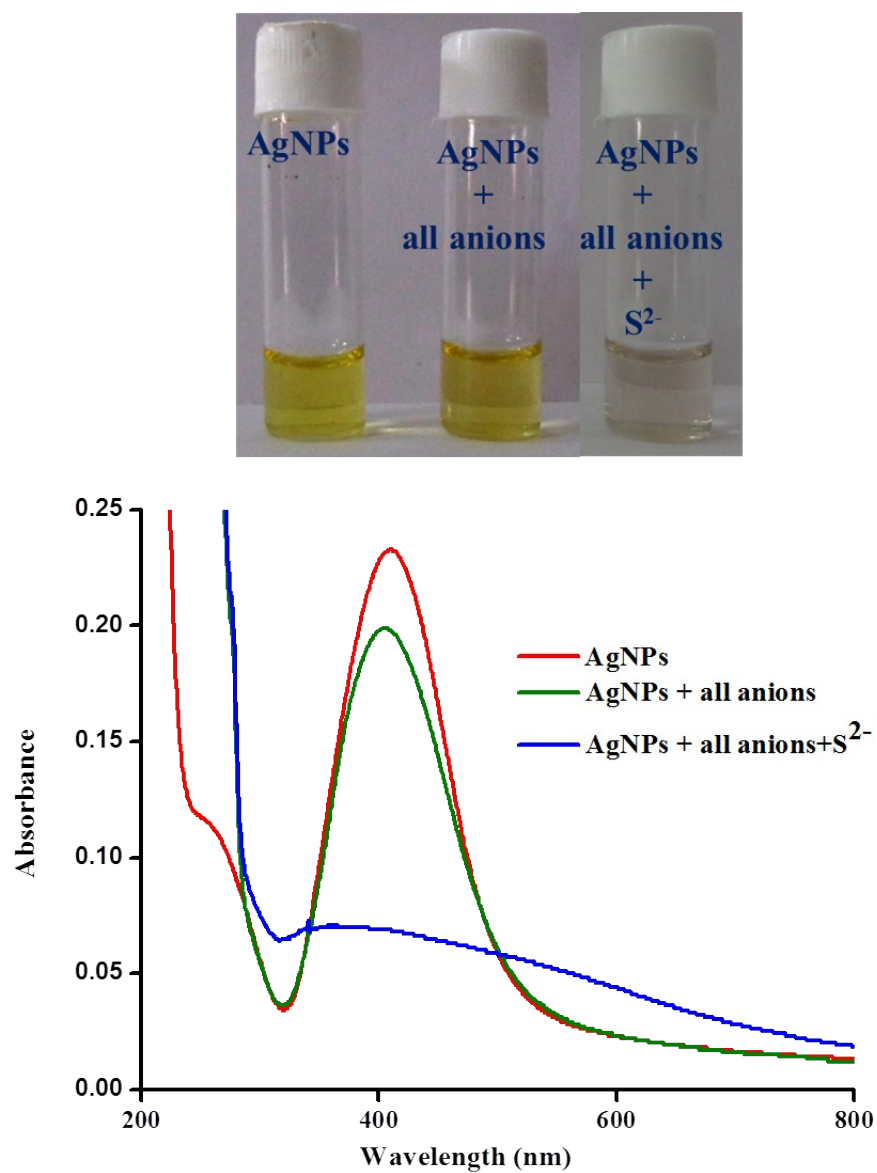

## Electronic Supporting Information

**Figure S10:** Naked eye response and UV-visible spectrum of AgNPs in the mixture of all cations ( $10\ \mu\text{l}$  of  $1.0\times 10^{-1}\ \text{M}$ ) and addition of  $\text{S}^{2-}$  ( $10\ \mu\text{l}$  of  $1.0\times 10^{-1}\ \text{M}$ ) to the same:

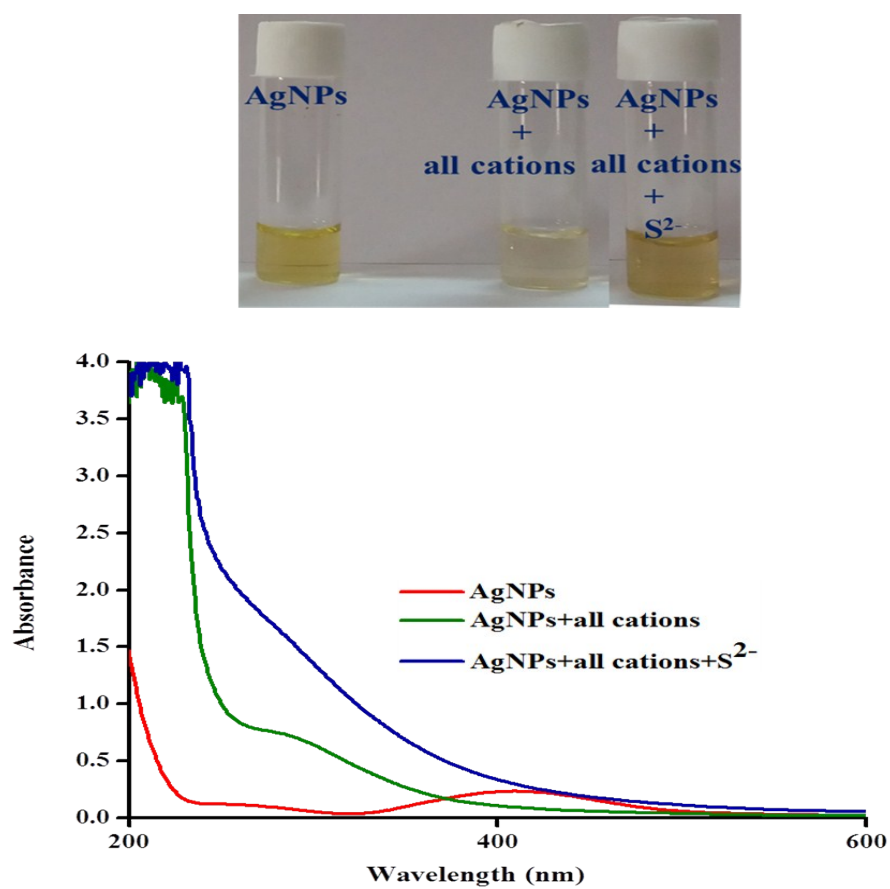

## *Electronic Supporting Information*

**Figure S11a:** Stability of AgNPs at different pH (1 to 13):

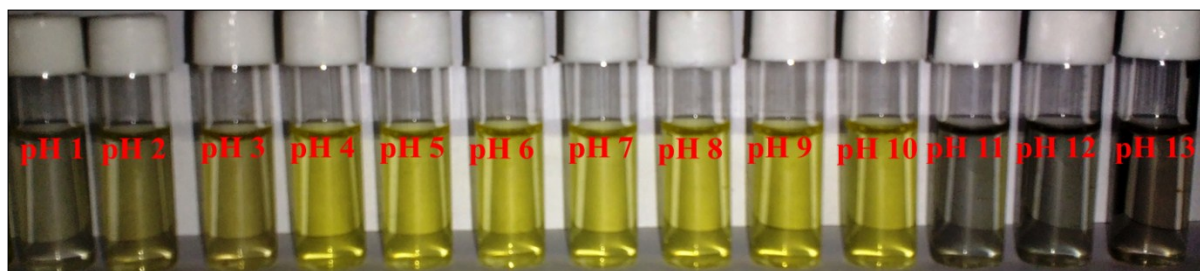

**Figure S11b:** Colorimetric sensing of  $S^{2-}$  through AgNPs at different pH (1 to 13):

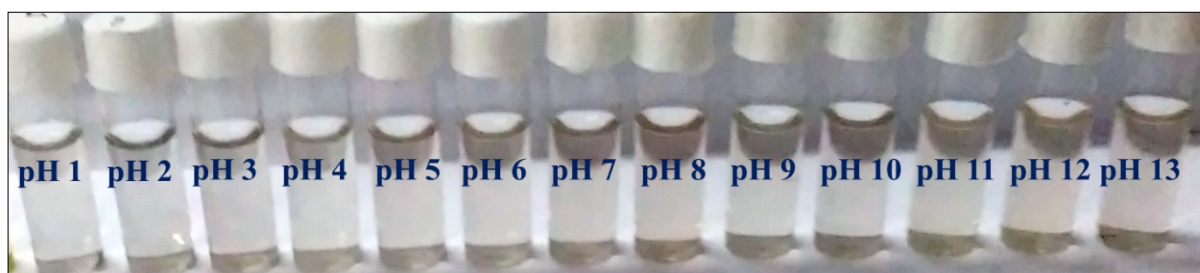

## Electronic Supporting Information

**Figure S12:** UV-visible spectrum of  $5 \times 10^{-5}$  M CA and on the addition of  $10 \mu\text{l}$  of  $1.0 \times 10^{-1}$  M  $\text{S}^{2-}$  to it:

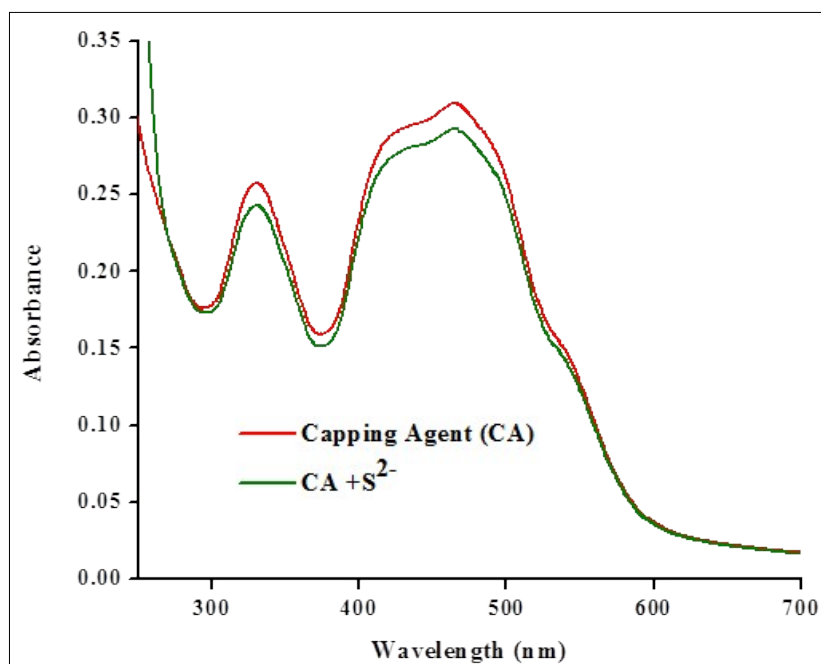

## Electronic Supporting Information

**Figure S13a:** EDX of spherical shaped CA capped AgNPs:

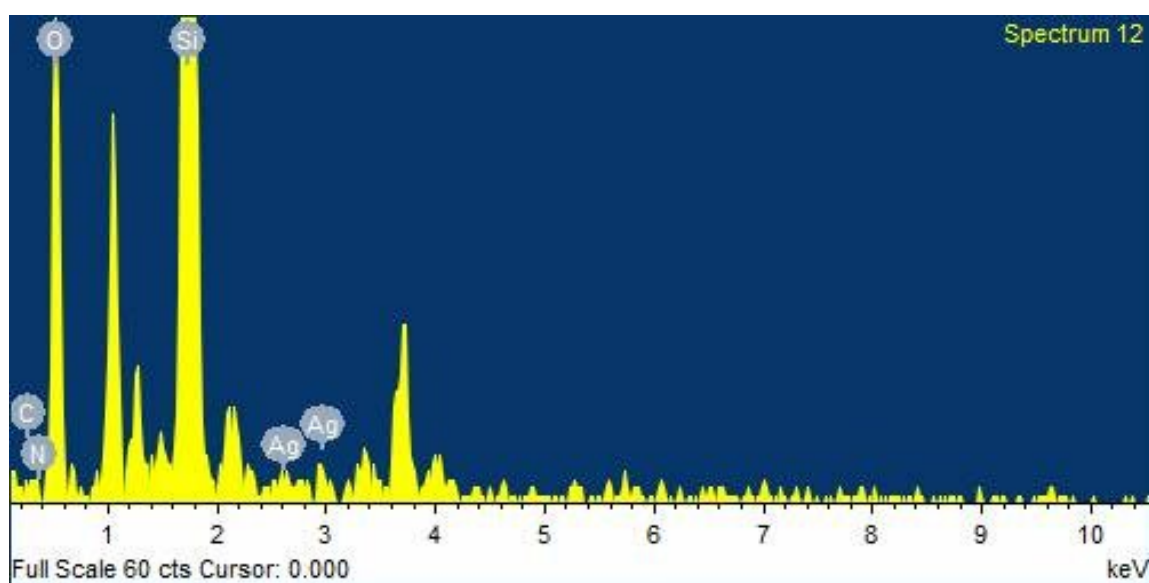

**Figure S13b:** EDX of S<sup>2-</sup> induced dendritic architecture of AgNPs.

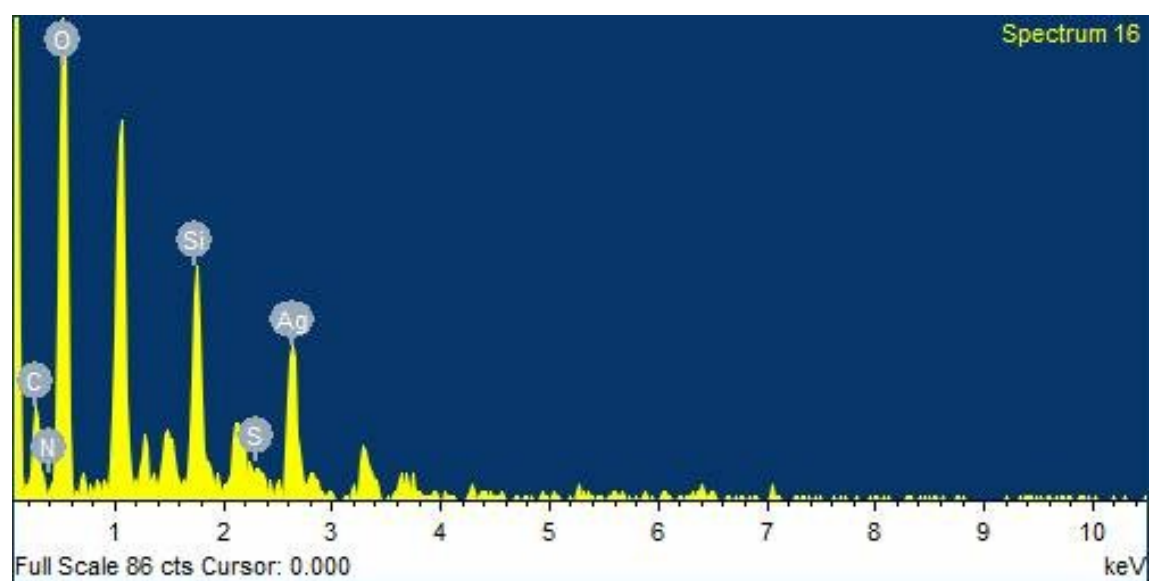

Supplement: c5ra25625a1.pdf [file c5ra25625a1.pdf]
